# Supplementary material
Source: HighWire-hosted journal article supplement (https://bmjopenquality.bmj.com/highwire/filestream/147305/field_highwire_adjunct_files/0/bmjoq-2023-002467supp001_data_supplement.pdf)

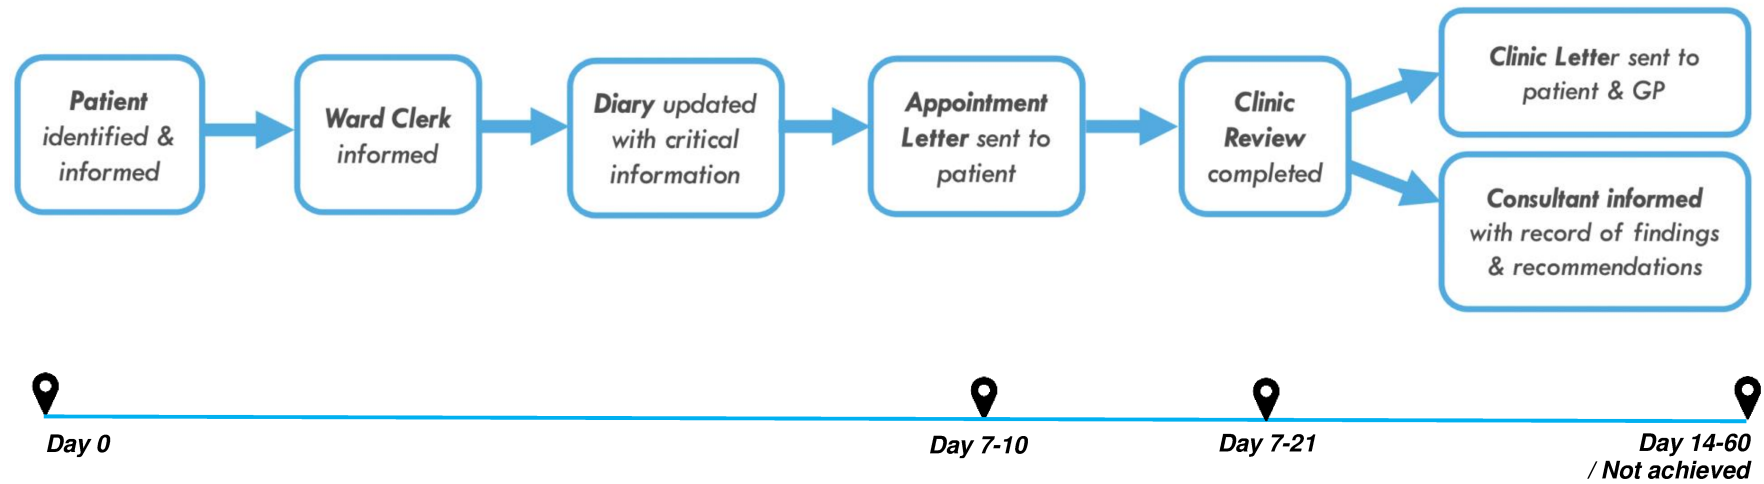

Supplement 1. High Level Process Map

Supplement: bmjoq-2023-002467supp001_data_supplement.pdf [file bmjoq-2023-002467supp001_data_supplement.pdf]
